# Supplementary material for: Carbon dots prepared from citric acid and urea by microwave-assisted irradiation as a turn-on fluorescent probe for allantoin determination
Source: Royal Society of Chemistry journal article supplement (doi:10.1039/d1nj03284d), 2021-01-01
Supplement: d1nj03284d1.pdf [file d1nj03284d1.pdf]

*New Journal of Chemistry*  
**Supplementary Information**

**Carbon dots prepared from citric acid and urea by microwave-assisted irradiation as a turn-on fluorescent probe for allantoin determination**

Ratchadaporn Seedad, Sasimaporn khuthinakhun, Nuanlaor Ratanawimarnwong, Piyada Jittangprasert, Thitirat Mantim, and Kriangsak Songsrirote\*

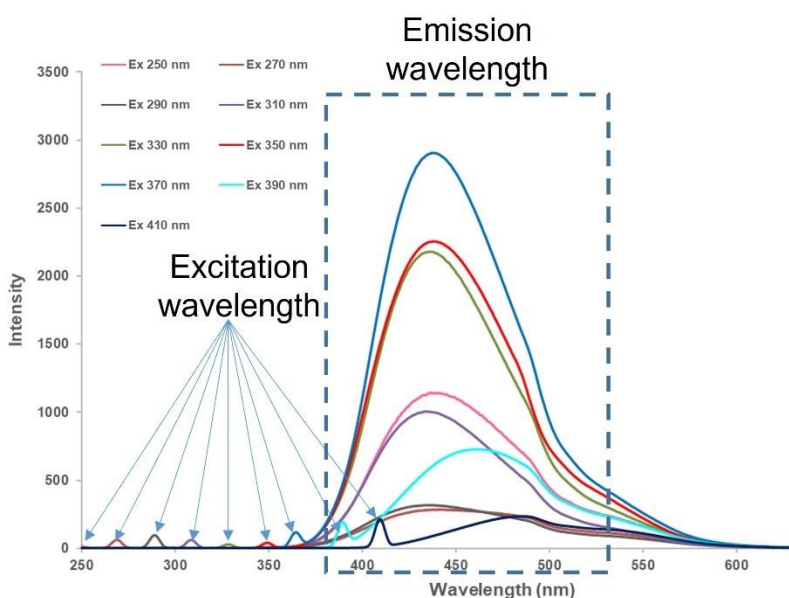

**Fig. S1** Emission Spectra of the CDs with different excitation wavelengths.

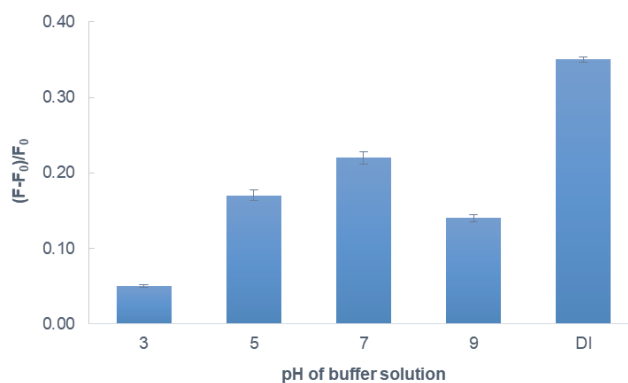

**Fig. S2** Enhancement factor of blue CDs dissolved in buffer solutions (pH 3-9) and in DI water with 10 ppm allantoin under volume ratio of 1:1 and a reaction time of 15 min.

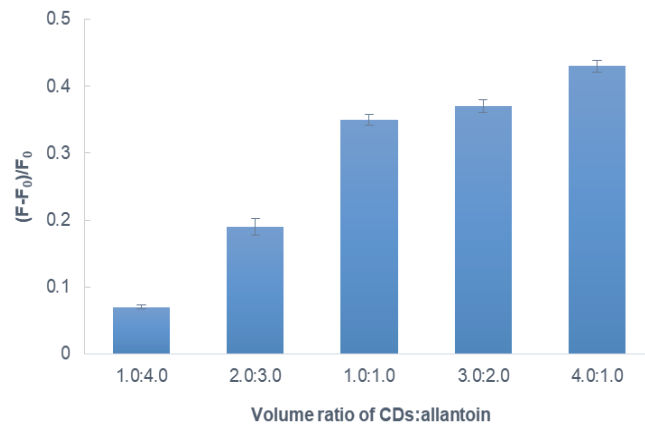

**Fig. S3** Enhancement factor of blue CDs dissolved in DI water mixed with 10 ppm allantoin at different ratios. A total volume mixture of 500  $\mu$ L was used and a reaction time of 15 min.

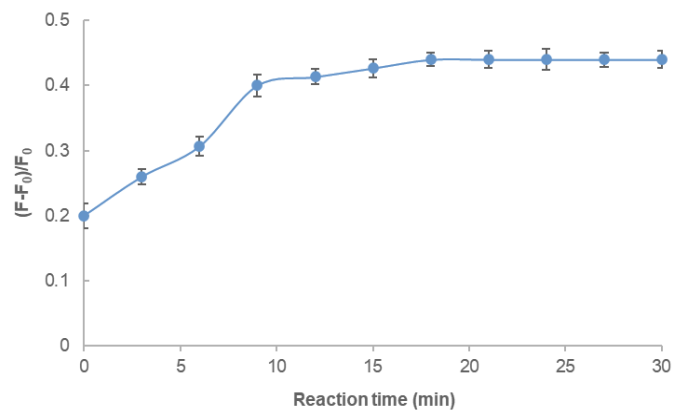

**Fig. S4** Enhancement factor of blue CDs dissolved in DI water mixed with 10 ppm allantoin (4:1 ratio of CD: allantoin) at different reaction times.

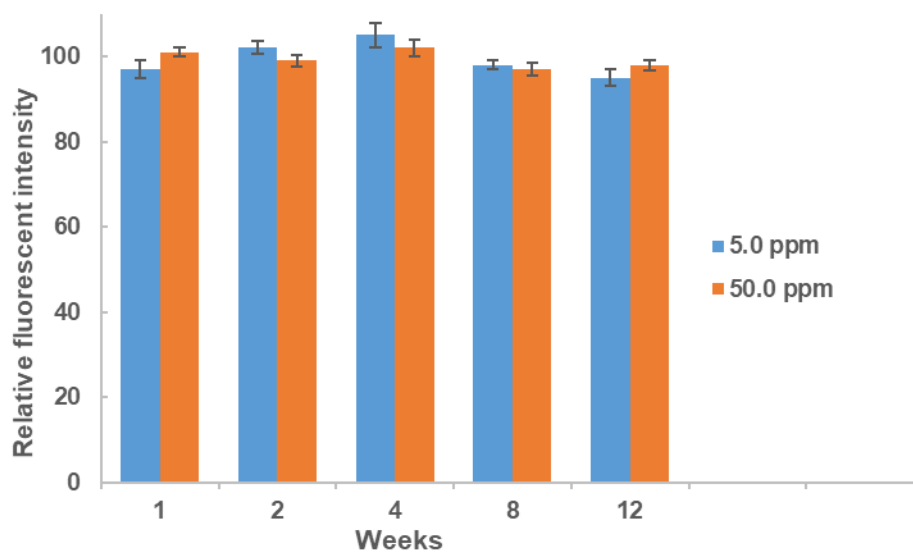

**Fig. S5** The relative fluorescent intensities of the CDs in the presence of 5.0 and 50.0 ppm allantoin, using the same batch of the CDs during 3 months of storing.
